# Supplementary material for: Analysis of Pork in Beef Sausages Using LC-Orbitrap HRMS Untargeted Metabolomics Combined with Chemometrics for Halal Authentication Study
Source: MDPI journal article supplement (doi:10.3390/molecules28165964), 2023-08-09
Supplement: s1 [file s1]

## Supplementary material

# Analysis of Pork in Beef Sausages using LC-Orbitrap HRMS Untargeted Metabolomics Combined with Chemometrics for Halal Authentication Study

**Table S1.** Discriminating metabolites potential for biomarker candidates for discrimination of pork in beef sausage investigated using variable importance for projections of PLS-DA with VIP more than 1.5

| No. | Compounds                                                                                         | VIP  | Formula                                                         | Calculated<br>m/z | RT<br>(min) |
|-----|---------------------------------------------------------------------------------------------------|------|-----------------------------------------------------------------|-------------------|-------------|
| 1   | 2-arachidonyl-sn-glycero-3-phosphoethanolamine                                                    | 2.62 | C <sub>25</sub> H <sub>44</sub> NO <sub>7</sub> P               | 501.28405         | 18.063      |
| 2   | 3-hydroxyoctanoylcarnitine                                                                        | 2.61 | C <sub>15</sub> H <sub>29</sub> NO <sub>5</sub>                 | 303.20397         | 7.982       |
| 3   | 8Z,11Z,14Z-Eicosatrienoic acid                                                                    | 2.49 | C <sub>20</sub> H <sub>34</sub> O <sub>2</sub>                  | 306.25484         | 20.001      |
| 4   | D-(+)-Galactose                                                                                   | 2.43 | C <sub>6</sub> H <sub>12</sub> O <sub>6</sub>                   | 180.06254         | 0.743       |
| 5   | N,N-Diethyldodecanamide                                                                           | 2.40 | C <sub>16</sub> H <sub>33</sub> NO                              | 255.25549         | 13.786      |
| 6   | Acetyl-L-carnitine                                                                                | 2.30 | C <sub>9</sub> H <sub>17</sub> NO <sub>4</sub>                  | 203.11496         | 0.735       |
| 7   | Methionylleucine                                                                                  | 2.26 | C <sub>11</sub> H <sub>22</sub> N <sub>2</sub> O <sub>3</sub> S | 262.13459         | 5.189       |
| 8   | Oleamide                                                                                          | 2.19 | C <sub>18</sub> H <sub>35</sub> NO                              | 281.27061         | 19.323      |
| 9   | 3-hydroxyhexadecanoylcarnitine                                                                    | 2.18 | C <sub>23</sub> H <sub>45</sub> NO <sub>5</sub>                 | 415.32865         | 16.184      |
| 10  | Arachidonic acid                                                                                  | 2.17 | C <sub>20</sub> H <sub>32</sub> O <sub>2</sub>                  | 304.23968         | 19.454      |
| 11  | Carnosine                                                                                         | 2.12 | C <sub>9</sub> H <sub>14</sub> N <sub>4</sub> O <sub>3</sub>    | 226.10579         | 0.682       |
| 12  | α-Eleostearic acid                                                                                | 2.09 | C <sub>18</sub> H <sub>30</sub> O <sub>2</sub>                  | 278.22392         | 17.165      |
| 13  | D-lysopine                                                                                        | 2.02 | C <sub>9</sub> H <sub>18</sub> N <sub>2</sub> O <sub>4</sub>    | 218.12612         | 2.058       |
| 14  | Hexanoylcarnitine                                                                                 | 1.99 | C <sub>13</sub> H <sub>25</sub> NO <sub>4</sub>                 | 259.17782         | 6.697       |
| 15  | Monoolein                                                                                         | 1.98 | C <sub>21</sub> H <sub>40</sub> O <sub>4</sub>                  | 356.29111         | 19.599      |
| 16  | (2R)-1-[(2-Aminoethoxy)(hydroxy)phosphoryl]oxy}-3-hydroxy-2-propanyl (11Z)-11-icosenoate          | 1.97 | C <sub>25</sub> H <sub>50</sub> NO <sub>7</sub> P               | 507.33094         | 18.30       |
| 17  | Palmitoleic acid                                                                                  | 1.94 | C <sub>16</sub> H <sub>30</sub> O <sub>2</sub>                  | 254.22403         | 19.179      |
| 18  | Tiglylcarnitine                                                                                   | 1.84 | C <sub>12</sub> H <sub>21</sub> NO <sub>4</sub>                 | 243.14671         | 3.835       |
| 19  | Decanoylcarnitine                                                                                 | 1.82 | C <sub>17</sub> H <sub>33</sub> NO <sub>4</sub>                 | 315.24023         | 12.838      |
| 20  | Acetylcholine                                                                                     | 1.82 | C <sub>7</sub> H <sub>15</sub> NO <sub>2</sub>                  | 145.11001         | 0.722       |
| 21  | DL-Carnitine                                                                                      | 1.79 | C <sub>7</sub> H <sub>15</sub> NO <sub>3</sub>                  | 161.10479         | 0.729       |
| 22  | 3-(2-methylpropyl)-octahydropyrrolo[1,2-a]pyrazine-1,4-dione                                      | 1.78 | C <sub>11</sub> H <sub>18</sub> N <sub>2</sub> O <sub>2</sub>   | 210.13639         | 7.474       |
| 23  | Undecanedioic acid                                                                                | 1.72 | C <sub>11</sub> H <sub>20</sub> O <sub>4</sub>                  | 216.13548         | 12.667      |
| 24  | 3-Hydroxy-3-[(3-methylbutanoyl)oxy]-4-(trimethylammonio)butanoate                                 | 1.70 | C <sub>12</sub> H <sub>23</sub> NO <sub>5</sub>                 | 261.15705         | 1.308       |
| 25  | 2-(acetylamino)-4-(methylthio)butanoic acid                                                       | 1.69 | C <sub>7</sub> H <sub>13</sub> NO <sub>3</sub> S                | 191.06076         | 3.883       |
| 26  | 2-Acetyl-4-methylpyridine                                                                         | 1.69 | C <sub>8</sub> H <sub>9</sub> NO                                | 135.06833         | 1.059       |
| 27  | (2R)-3-[(2-Aminoethoxy)(hydroxy)phosphoryl]oxy}-2-hydroxypropyl (5Z,8Z,11Z)-5,8,11-Icosatrienoate | 1.66 | C <sub>25</sub> H <sub>46</sub> NO <sub>7</sub> P               | 503.30000         | 18.657      |
| 28  | C8-Carnitine                                                                                      | 1.63 | C <sub>15</sub> H <sub>29</sub> NO <sub>4</sub>                 | 287.20912         | 10.311      |

|    |                                                                                           |      |                                                             |           |        |
|----|-------------------------------------------------------------------------------------------|------|-------------------------------------------------------------|-----------|--------|
| 29 | (15Z)-9,12,13-Trihydroxy-15-octadecenoic acid                                             | 1.61 | C <sub>18</sub> H <sub>34</sub> O <sub>5</sub>              | 330.24020 | 13.85  |
| 30 | All-cis-4,7,10,13,16-Docosapentaenoic acid                                                | 1.55 | C <sub>22</sub> H <sub>34</sub> O <sub>2</sub>              | 330.25529 | 20.035 |
| 31 | (1Z,2S)-N-[(2S,3R,4E,8E)-1,3-Dihydroxy-4,8-octadecadien-2-yl]-2-hydroxyundecanimidic acid | 1.54 | C <sub>29</sub> H <sub>55</sub> NO <sub>4</sub>             | 481.41193 | 18.524 |
| 32 | Myristyl sulfate                                                                          | 1.54 | C <sub>14</sub> H <sub>30</sub> O <sub>4</sub> S            | 294.18622 | 21.649 |
| 33 | 3-(Icosanoyloxy)-4-(trimethylammonio)butanoate                                            | 1.53 | C <sub>27</sub> H <sub>53</sub> NO <sub>4</sub>             | 455.39619 | 18.470 |
| 34 | L-Histidine                                                                               | 1.52 | C <sub>6</sub> H <sub>9</sub> N <sub>3</sub> O <sub>2</sub> | 155.06919 | 0.777  |
| 35 | Sphinganine                                                                               | 1.51 | C <sub>18</sub> H <sub>39</sub> NO <sub>2</sub>             | 301.29712 | 15.226 |

---
